# Supplementary material for: A Comprehensive Coordinator Supported Hepatitis C Virus Testing and Linkage to Treatment Program at Kaiser Permanente Mid-Atlantic States
Source: Viruses. 2021 Oct 23;13(11):2140. doi: 10.3390/v13112140 (PMC8619706; doi:10.3390/v13112140)
Supplement: Supplementary file 1 [file viruses-13-02140-s001.zip › viruses-1414780-supplementary.pdf]

## Figure S1: The HCV Pathway

Adapted from Jonas MC, Rodriguez CV, Redd J, et al. Streamlining screening to treatment: the Hepatitis C cascade of care at Kaiser Permanente Mid-Atlantic States. Clin Infect Dis 2016;62(10):1292; with permission.

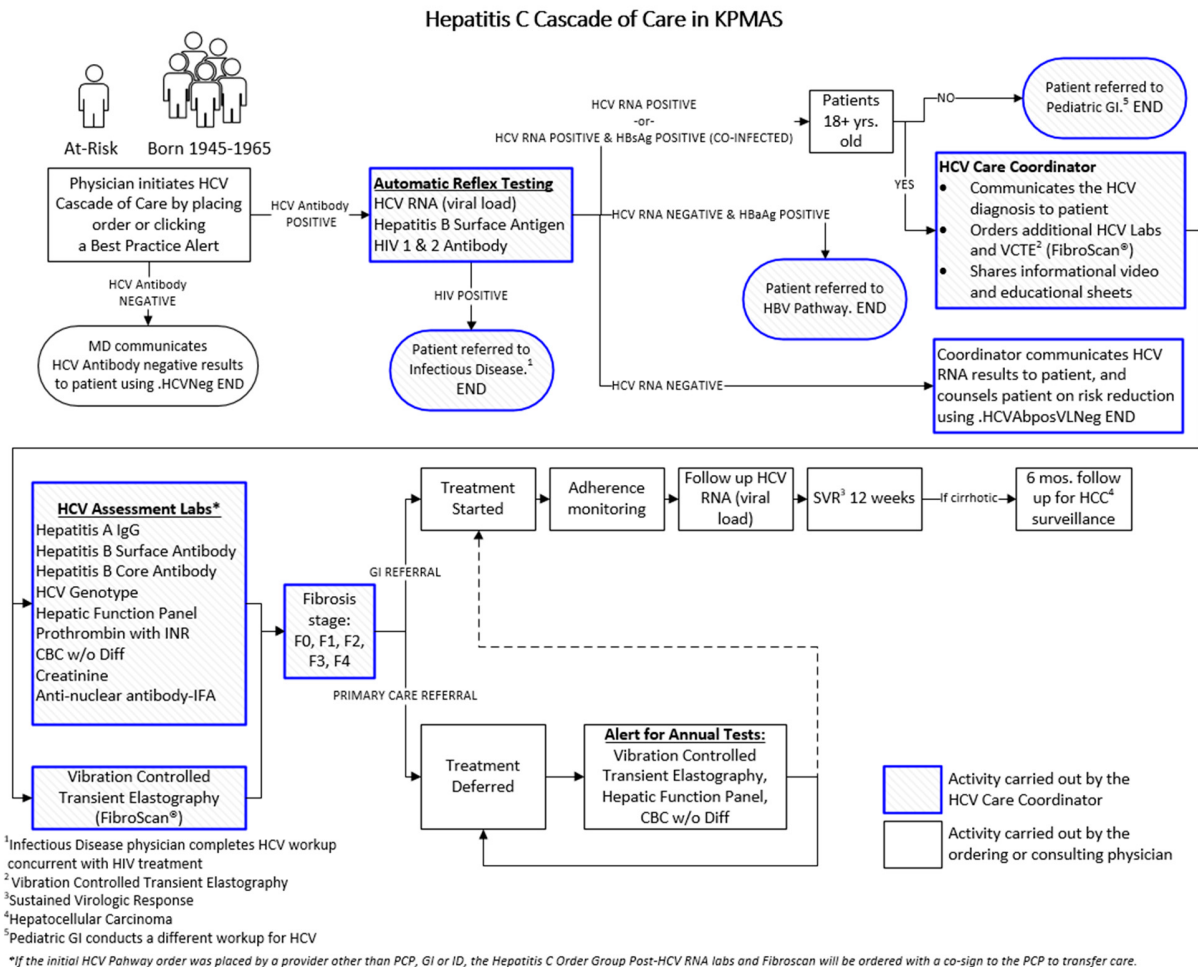

**Table S1: Distribution of estimated time from first HCV antibody order during the study period to outcome event**

|                                | Usual care first order                    |                                           |                                           | HCV Pathway first order                   |                                           |                                           |           |
|--------------------------------|-------------------------------------------|-------------------------------------------|-------------------------------------------|-------------------------------------------|-------------------------------------------|-------------------------------------------|-----------|
|                                | estimated days to 25% of events completed | estimated days to 50% of events completed | estimated days to 75% of events completed | estimated days to 25% of events completed | estimated days to 50% of events completed | estimated days to 75% of events completed | P-value * |
| <b>Fibroscan Result</b>        | 40                                        | 118                                       | > 365                                     | 14                                        | 26                                        | 72                                        | <0.001    |
| <b>GI Visit</b>                | 31                                        | 131                                       | > 365                                     | 31                                        | 63                                        | > 365                                     | <0.001    |
| <b>HCV RX Fill<sup>1</sup></b> | 115                                       | 326                                       | > 365                                     | 63                                        | 222                                       | > 365                                     | 0.001     |

\* Log-rank test for difference in distributions of time to event between pathway and non-pathway

<sup>1</sup> Direct Acting Antiviral prescription
